# Supplementary material
Source: PubMed Central journal article supplement (PMC8576742)
Supplement: NIHMS1730133-supplement-1.pdf [file NIHMS1730133-supplement-1.pdf]

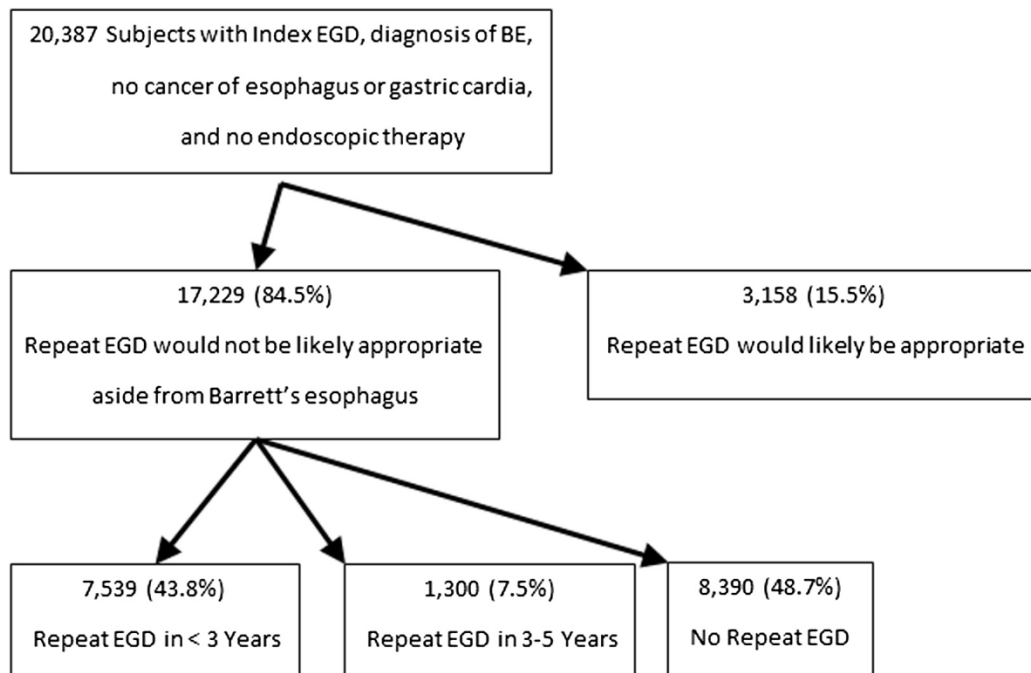

**Supplementary Figure 1.** Flow diagram of included subjects. EGD, esophagogastroduodenoscopy.

**Supplementary Table 1.** Cox Proportional Hazards for Repeat Endoscopy Excluding Individuals With Likely Appropriate Classification Aside From Barrett's Esophagus

| Factor                                   | No. with no surveillance /<br>No. with surveillance | Crude hazard ratio<br>(95% confidence interval) | Mutually adjusted<br>hazard ratio<br>(95% confidence interval) |
|------------------------------------------|-----------------------------------------------------|-------------------------------------------------|----------------------------------------------------------------|
| Sex                                      |                                                     |                                                 |                                                                |
| Male                                     | 5108 / 5479                                         | 1 (reference)                                   | 1 (reference)                                                  |
| Female                                   | 3291 / 3351                                         | 0.943 (0.903–0.984)                             | 0.951 (0.911–0.993)                                            |
| Age at index endoscopy, yr               |                                                     |                                                 |                                                                |
| 65–69                                    | 2537 / 2890                                         | 1 (reference)                                   | 1 (reference)                                                  |
| 70–74                                    | 2063 / 2561                                         | 0.965 (0.915–1.02)                              | 0.962 (0.912–1.02)                                             |
| 75–79                                    | 1745 / 1906                                         | 0.928 (0.876–0.983)                             | 0.921 (0.869–0.976)                                            |
| 80–84                                    | 1293 / 1031                                         | 0.839 (0.781–0.900)                             | 0.832 (0.775–0.894)                                            |
| 85–89                                    | 623 / 383                                           | 0.826 (0.743–0.918)                             | 0.818 (0.735–0.911)                                            |
| ≥90                                      | 138 / 59                                            | 0.615 (0.475–0.795)                             | 0.610 (0.471–0.790)                                            |
| Charlson-Deyo weighted comorbidity score |                                                     |                                                 |                                                                |
| 0                                        | 1605 / 958                                          | 1 (reference)                                   | 1 (reference)                                                  |
| 1                                        | 1457 / 1245                                         | 0.959 (0.882–1.04)                              | 0.963 (0.885–1.05)                                             |
| 2                                        | 1280 / 1301                                         | 0.971 (0.893–1.05)                              | 0.980 (0.901–1.06)                                             |
| 3                                        | 1084 / 1166                                         | 0.960 (0.882–1.04)                              | 0.977 (0.897–1.06)                                             |
| 4–5                                      | 1353 / 1815                                         | 0.999 (0.924–1.08)                              | 1.02 (0.946–1.11)                                              |
| 6–8                                      | 959 / 1415                                          | 0.995 (0.917–1.08)                              | 1.03 (0.950–1.12)                                              |
| >9                                       | 661 / 930                                           | 1.00 (0.915–1.10)                               | 1.04 (0.948–1.14)                                              |
| Region                                   |                                                     |                                                 |                                                                |
| Northeast                                | 1421 / 1864                                         | 1 (reference)                                   | 1 (reference)                                                  |
| North Central                            | 2269 / 2738                                         | 0.895 (0.844–0.949)                             | 0.899 (0.848–0.953)                                            |
| South                                    | 2963 / 2514                                         | 0.950 (0.895–1.01)                              | 0.948 (0.893–1.01)                                             |
| West                                     | 1435 / 1445                                         | 0.874 (0.816–0.936)                             | 0.878 (0.820–0.940)                                            |
| Unknown                                  | 311 / 269                                           | 0.969 (0.853–1.10)                              | 0.963 (0.847–1.09)                                             |
